# Supplementary material
Source: MDPI journal article supplement (https://www.mdpi.com/2073-4441/10/10/1480)
Supplement: s1 [file s1]

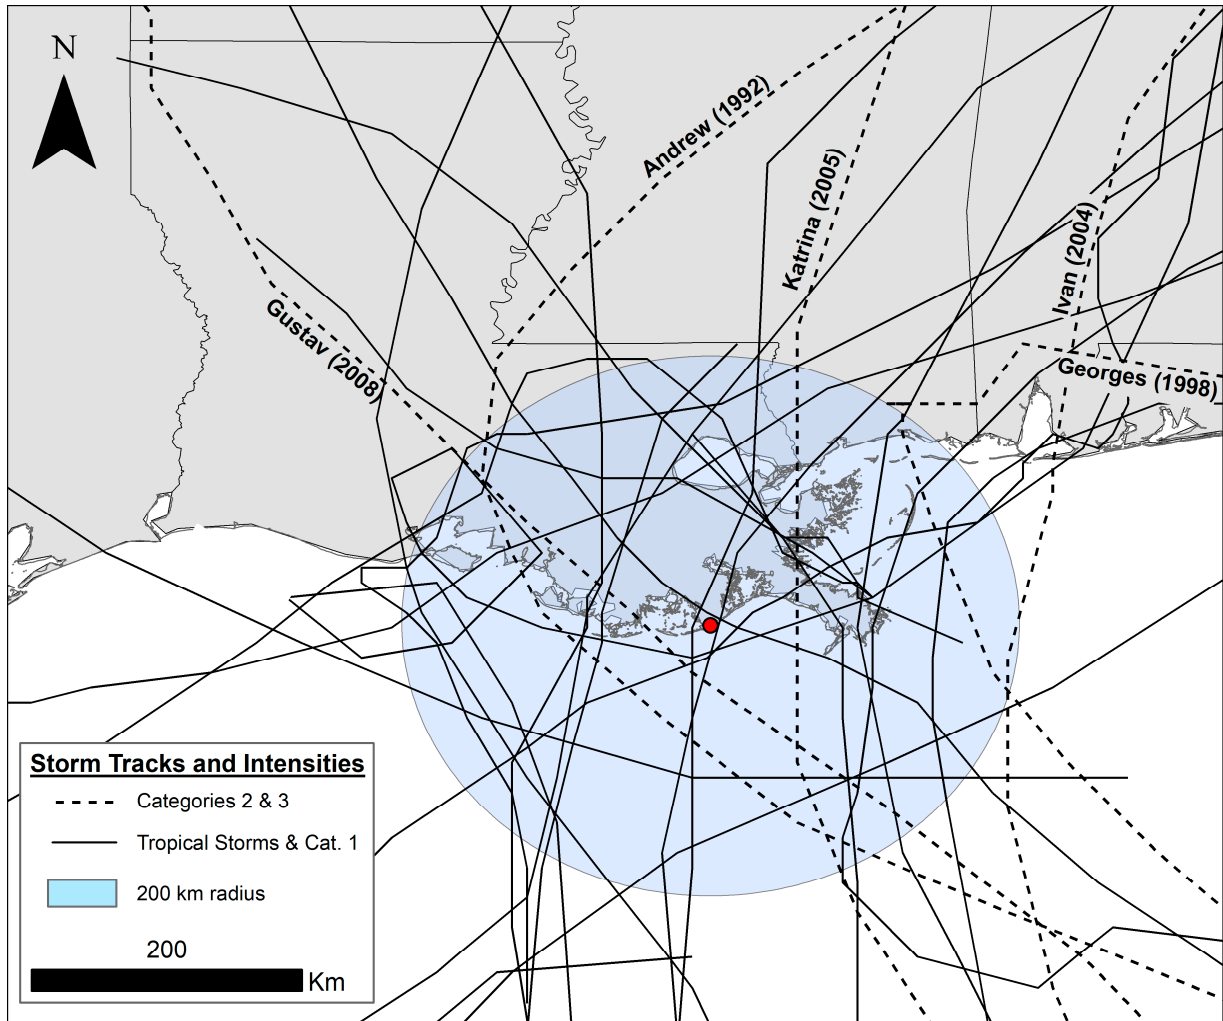

**Figure S1.** Tracks and intensities of hurricanes within 200 kilometers of Bay Champagne (red dot) between 1983 and 2018. Intensity is determined by the strength of the hurricane at landfall. The tracks of stronger hurricanes (Category 2 & 3) are shown as dotted lines; tracks of Category 1 hurricanes and tropical storms are shown as solid black lines. All but five of these hurricanes occurred between 1997 and 2012. Track and intensity data from NOAA Historical Hurricane Track database (<https://coast.noaa.gov/hurricanes>).
